# Supplementary material for: It’s safe to move! A protocol for a randomised controlled trial investigating the effect of a video designed to increase people’s confidence becoming more active despite back pain
Source: PubMed Central journal article supplement — BMJ Open. 2022 Jul 14;12(7):e063250. doi: 10.1136/bmjopen-2022-063250 (PMC9295673; doi:10.1136/bmjopen-2022-063250), 2022-07-14
Supplement: bmjopen-2022-063250.draft_revisions.pdf [file bmjopen-2022-063250.draft_revisions.pdf]

# BMJ Open

BMJ Open is committed to open peer review. As part of this commitment we make the peer review history of every article we publish publicly available.

When an article is published we post the peer reviewers' comments and the authors' responses online. We also post the versions of the paper that were used during peer review. These are the versions that the peer review comments apply to.

The versions of the paper that follow are the versions that were submitted during the peer review process. They are not the versions of record or the final published versions. They should not be cited or distributed as the published version of this manuscript.

BMJ Open is an open access journal and the full, final, typeset and author-corrected version of record of the manuscript is available on our site with no access controls, subscription charges or pay-per-view fees (<http://bmjopen.bmj.com>).

If you have any questions on BMJ Open's open peer review process please email [info.bmjopen@bmj.com](mailto:info.bmjopen@bmj.com)

# BMJ Open

**It's ok to move! A protocol for a randomised controlled trial investigating the effect of a video designed to increase people's confidence becoming more active despite back pain.**

|                               |                                                                                                                                                                                                                                                                                                                                                                                                                                                                                                                                                                                                                                                                                                                                                                                                                                                                                                                                                                                      |
|-------------------------------|--------------------------------------------------------------------------------------------------------------------------------------------------------------------------------------------------------------------------------------------------------------------------------------------------------------------------------------------------------------------------------------------------------------------------------------------------------------------------------------------------------------------------------------------------------------------------------------------------------------------------------------------------------------------------------------------------------------------------------------------------------------------------------------------------------------------------------------------------------------------------------------------------------------------------------------------------------------------------------------|
| Journal:                      | <i>BMJ Open</i>                                                                                                                                                                                                                                                                                                                                                                                                                                                                                                                                                                                                                                                                                                                                                                                                                                                                                                                                                                      |
| Manuscript ID                 | bmjopen-2022-063250                                                                                                                                                                                                                                                                                                                                                                                                                                                                                                                                                                                                                                                                                                                                                                                                                                                                                                                                                                  |
| Article Type:                 | Protocol                                                                                                                                                                                                                                                                                                                                                                                                                                                                                                                                                                                                                                                                                                                                                                                                                                                                                                                                                                             |
| Date Submitted by the Author: | 25-Mar-2022                                                                                                                                                                                                                                                                                                                                                                                                                                                                                                                                                                                                                                                                                                                                                                                                                                                                                                                                                                          |
| Complete List of Authors:     | O'Hagan, Edel; Neuroscience Research Australia; University of New South Wales<br>Traeger, Adrian; The University of Sydney Faculty of Medicine and Health, Institute for Musculoskeletal Health, Sydney School of Public Health<br>Schabrun, Siobhan; The University of Western Sydney, Brain Rehabilitation and Neuroplasticity Unit<br>O'Neill, Sean; Liverpool Hospital, Department of Rheumatology; Ingham Institute<br>Wand, Benedict; The University of Notre Dame Australia<br>Cashin, Aidan; Neuroscience Research Australia, Centre for Pain IMPACT; University of New South Wales, Prince of Wales Clinical School<br>Williams, Christopher; Hunter Medical Research Institute, University of Newcastle, School of Medicine and Public Health; Hunter New England Local Health District, Population Health<br>Harris, Ian A; The University of Sydney; The University of New South Wales<br>McAuley, James; Neuroscience Research Australia, University of New South Wales |
| Keywords:                     | Pain management < ANAESTHETICS, World Wide Web technology < BIOTECHNOLOGY & BIOINFORMATICS, Back pain < ORTHOPAEDIC & TRAUMA SURGERY                                                                                                                                                                                                                                                                                                                                                                                                                                                                                                                                                                                                                                                                                                                                                                                                                                                 |
|                               |                                                                                                                                                                                                                                                                                                                                                                                                                                                                                                                                                                                                                                                                                                                                                                                                                                                                                                                                                                                      |

SCHOLARONE™  
Manuscripts

1  
2  
3  
4  
5 **It's ok to move! A protocol for a randomised controlled trial investigating the effect of a**  
6 **video designed to increase people's confidence becoming more active despite back pain.**  
7  
8

9  
10 Edel T O'Hagan<sup>1 2 3</sup>

11 Adrian C Traeger<sup>4</sup>

12 Siobhan M Schabrun<sup>1 3</sup>

13 Sean O'Neill<sup>3 5 6</sup>

14 Benedict M Wand<sup>7</sup>

15 Aidan G Cashin<sup>1 8</sup>

16 Christopher M Williams<sup>4</sup>

17 Ian A Harris<sup>3 4 5 9</sup>

18 James H McAuley<sup>1 8</sup>

19  
20  
21  
22  
23  
24  
25  
26  
27 1 Centre for Pain IMPACT, Neuroscience Research Australia, Sydney, New South Wales,  
28 Australia

29  
30 2 Prince of Wales Clinical School, University of New South Wales, Sydney, New South  
31 Wales, Australia

32  
33 3 Maridulu Budyari Gumal

34  
35 4 Institute for Musculoskeletal Health, Sydney School of Public Health, Faculty of Medicine  
36 and Health, The University of Sydney, Sydney, New South Wales, Australia.

37  
38 5 South Western Sydney Clinical School, Liverpool Hospital, The University of New South  
39 Wales, Sydney, New South Wales, Australia

40  
41 6 Institute of Bone and Joint Research, Kolling Institute, The University of Sydney, Sydney,  
42 New South Wales, Australia

43  
44 7 Faculty of Medicine, Nursing & Midwifery and Health Sciences, The University of Notre  
45 Dame Australia, Fremantle, Western Australia, Australia

46  
47 8 School of Health Sciences, Faculty of Medicine and Health, University of New South  
48 Wales, Sydney, New South Wales, Australia

49  
50 9 Ingham Institute of Applied Medical Research, Liverpool, Sydney, New South Wales,  
51 Australia

1  
2  
3 **Correspondence and requests for reprints to Edel O'Hagan, NeuRA, 139 Barker Street,**  
4 **Randwick 2031 NSW. Australia. Phone: +61(2) 93991618 Email:**  
5 **[e.ohagan@neura.edu.au](mailto:e.ohagan@neura.edu.au)**  
6  
7  
8  
9

### 10 **Trial Registration**

11  
12  
13 The trial is registered with the Australia New Zealand Clinical Trials Registry (ANZCTR)

14 Trial Id: ACTRN12622000466741

15 The protocol is uploaded to the Open Science Framework website, under embargo.

16  
17 <https://osf.io/c7j8t/>  
18  
19  
20

### 21 **Protocol**

22  
23  
24 This protocol is reported following the SPIRIT checklist. [1] This is protocol version 1.  
25  
26  
27  
28  
29  
30  
31  
32  
33  
34  
35  
36  
37  
38  
39  
40  
41  
42  
43  
44  
45  
46  
47  
48  
49  
50  
51  
52  
53  
54  
55  
56  
57  
58  
59  
60

## Abstract

## Introduction

Social media provide promising contemporary platforms for sharing public health information with a broad audience. Before implementation, testing social media campaigns that are intended to engage audiences and initiate behaviour change is necessary. This trial aims to investigate the effectiveness of a public health campaign to increase people's confidence in becoming more active despite low back pain in comparison with no intervention.

## Methods and analysis

This is an online randomised controlled trial with two intervention groups and one control group in a 1:1:1 allocation. People over 18 years of age and fluent in English will be recruited via social media advertising. We developed a social media-based public health campaign to support recommendations for managing low back pain. The interventions are two videos. Participants in the control group will be asked questions about low back pain but will not view either video intervention. The primary outcome will be item 10 of the pain self-efficacy questionnaire, which asks participants to rate how confident they would feel to gradually become more active despite pain ranging from 0 (not at all confident) to 6 (completely confident). This outcome will be measured immediately in all participant groups. We will compare group means of the three arms of the trial using univariate analyses of variance.

## Ethics and dissemination

This trial has been prospectively registered with the Australian New Zealand Clinical Trials Registry. We obtained ethical approval from our institutions Human Research Ethics Committee (HREC) before data collection. We will publish the results in a peer-reviewed medical journal and on institution websites.

### Strengths and limitations

- This randomised controlled trial will investigate a new, simple, inexpensive approach to delivering a public health message about low back pain on a large scale
- A randomised controlled design allows for testing an intervention before being widely disseminated, which is not typical of mass media campaigns
- An entirely online randomised controlled trial allows participation across the world to increase the generalisability of the results
- We will include qualitative methods to understand how to optimise the intervention
- We will investigate the effect on proximal outcomes only, therefore have a limited insight into the effect on distal outcomes such as healthcare use

## Introduction

### Background and rationale

Low back pain is common and burdensome. The point prevalence of activity-limiting low back pain lasting more than one day is 7.8%, meaning that 577 million people have low back pain at any one time across the world. [2] Low back pain is the leading cause of disability worldwide, causing one of the largest absolute increases in the number of days lost to disability of any health condition over the last 20 years. [3] Experts from The Lancet Low Back Pain Series Working Group predict the cost of low back pain will continue to escalate. [4] Large scale initiatives are necessary to stem the cost of this global public health concern. [5]

Recent research suggests that people with low back pain value learning about causes of low back pain, [6] and people with low back pain who accept evidence-based messages, such as, pain does not equal damage, are likely to intend to self-manage their low back pain. [7] Yet, inaccurate information is common in community healthcare settings [8] and on health websites. [9] [10] Population based surveys conducted in Ireland, [11] Australia, [12] Norway, [13] Switzerland [14] and Canada [15] highlighted that an unhelpful, medicalised view of back pain is common. Challenging unhelpful beliefs about low back pain was identified as one of top ten priorities for researchers, considered vital to reverse the alarming global rise in low back pain disability and health care costs. [16]

One approach that has been successful at decreasing low back pain related costs on a large scale are mass media campaigns [17] [18] that deliver a public health message to a broad audience. [19] [20] An Australian mass media public health campaign effectively changed beliefs about low back pain and reduced associated costs.[17] [21] However, similar campaigns in Norway, [22] [23] Scotland, [24] Ireland, [25] and Canada [26] failed to demonstrate any impact on low back pain related health costs. One factor evident in the successful Australian campaign was the broad reach; the campaign reached 86% of the target population. [18] Social media provide promising contemporary platforms for sharing public health information with a broad audience. [27] Social media campaigns have the capacity for broad reach as there are 3.8 billion active social media users worldwide. [28] When a social media campaign is engaging, it can generate increasing likes and shares, termed "viral". [29]

1  
2  
3 A viral campaign creates a self-proliferating message, further extending reach. [29] [30] A  
4 poorly developed campaign could fail to engage the targeted group. [31] A recent process  
5 evaluation of health communication and promotion campaigns on social media found that  
6 campaigns often do not sufficiently engage audiences to impact health behaviour. [32] Before  
7 implementation, testing social media campaigns intended to engage audiences and initiate  
8 behaviour change is necessary.  
9

10  
11  
12 In this trial, we will investigate the effectiveness of a campaign about low back pain  
13 compared to no intervention at improving an essential domain of pain-related self-efficacy.  
14 We will conduct qualitative testing, including evaluating engagement to maximise the impact  
15 of delivering a reassuring message about low back pain using social media.  
16  
17  
18  
19  
20  
21  
22

### 23 Objective

24 This trial aims to investigate the effectiveness of a public health campaign to increase  
25 people's confidence in becoming more active despite low back pain in comparison with no  
26 intervention.  
27  
28  
29  
30  
31

### 32 Trial design

33 This trial is a three-group, parallel, randomised controlled trial (RCT) with two intervention  
34 groups and one control group in a 1:1:1 allocation.  
35  
36  
37  
38

### 39 **Methods**

#### 40 Participants and interventions and outcomes

##### 41 *Study setting:*

42 This will be an online community-based global trial. Participants will be recruited via social  
43 media advertising.  
44  
45

##### 46 *Eligibility criteria:*

47 People will be eligible for inclusion in this RCT if they are over 18 years of age and able to  
48 understand spoken and written English.  
49  
50  
51  
52  
53  
54  
55  
56  
57  
58  
59  
60



### *Interventions*

In collaboration with an advertising agency, VMLY&R, we developed a public health campaign, delivered by social media, to support recommendations for managing low back pain. The interventions comprise of videos described in brief below and in more detail in accordance with the TIDieR checklist in Appendix 1.

The video interventions are between 2 and 3 minutes long. Both follow the same narrative that scientists would like to reassure the public that low back pain is common, and that evidence suggests it is safe to move despite back pain. The featured scientists report that they are unsure of how to convey these messages to the public, which leads to designers at the advertising agency brainstorming how to help deliver the key message that it is safe to move. The advertising agency personnel suggest a dance. The video cuts back to the scientists who are reluctant to endorse one specific movement, such as a dance and conclude that it does not matter what you do as long as you move. The video ends with the superimposed text, "It's safe to move", "Your backbone has backbone". The second video is the same as the first, except that when the advertising agency suggests the dance, the scientists try it out and to add humour, there are some video clips of the scientists dancing.

Participants in the control group will not view either video intervention.

### *Outcomes*

We will conduct both a quantitative and qualitative evaluation. When completing the outcomes, those without low back pain will be presented with a scenario where they have low back pain. In addition to the primary and secondary outcomes, participants randomised to either video intervention group will be asked additional questions regarding the video content, their engagement level, and overall experience.

### *Baseline questionnaires*

Baseline questionnaires will include questions on age and gender. In addition, we will ask participants about the presence of low back pain, pain intensity over the preceding 24-hours and the duration of the current episode of low back pain.

### *Primary outcome*

The intervention is intended to increase a person's confidence (or self-efficacy) that they can move safely despite low back pain. The primary outcome is therefore is item 10 of the Pain Self-Efficacy Questionnaire (PSEQ) [26], a commonly used measure of self-efficacy for people with chronic pain. [33] Item 10 of the PSEQ asks participants to rate how confident they would feel to gradually become more active despite the pain with a range from 0 (not at all confident) to 6 (completely confident).

### *Secondary outcome*

The secondary outcomes will be Factor 1 of the AxEL-Q Questionnaire. [34] The AxEL-Q is a questionnaire designed to assess attitudes toward first-line care for low back pain, Factor 1 comprises nine items and evaluates *Attitude toward staying active*. The score range for Factor 1 is 0 to 54, with higher scores indicating a more positive attitude toward messages about staying active. This outcome will be measured immediately in all participant groups.

### *Qualitative evaluation*

We will conduct a mixed-methods qualitative evaluation consisting of three parts. Firstly, to understand the helpfulness of the video, we will ask participants four questions rated on a 7-point Numeric Rating Scale. Secondly, we will evaluate engagement with the video by asking participants six Yes/No questions. Finally, we will ask participants four open-ended questions to understand their experience watching the video. The questions included in the qualitative evaluation are outlined in Table 1.

**Table 1- Questions that participants will be asked to understand engagement with video interventions**

| <b>Helpfulness of the video</b><br><i>(rated on a 7-point Numeric Rating Scale)</i>                     | <b>Engagement with the video</b><br><i>(Yes/No)</i> | <b>Experience of watching the video</b><br><i>(Open-ended)</i> |
|---------------------------------------------------------------------------------------------------------|-----------------------------------------------------|----------------------------------------------------------------|
| Overall, did you find this video helpful, with a range from 0=not at all helpful to 6=extremely helpful | Did you like the video?                             | If any, what aspects were unclear to you?                      |

|                                                                                                                                                     |                                                                                                                                                                                                                                            |                                                                                                                                 |
|-----------------------------------------------------------------------------------------------------------------------------------------------------|--------------------------------------------------------------------------------------------------------------------------------------------------------------------------------------------------------------------------------------------|---------------------------------------------------------------------------------------------------------------------------------|
| <p>The information in the video was relevant to me, with a range from 0=not at all relevant to 6=extremely relevant</p>                             | <p>If you noticed this video in your social media feed, would you view it?</p> <p>If you viewed this video on your feed or timeline would “like” it?</p> <p>If you saw this video on your feed or timeline would share or re-tweet it?</p> | <p>What new things did you learn?</p>                                                                                           |
| <p>How much of the information in the video was NEW information for you, with a range from 0=no new information 6=great deal of new information</p> | <p>After watching the video, are you any less likely to request imaging (e.g. x-ray or MRI) for back pain?</p>                                                                                                                             | <p>What did you dislike?</p>                                                                                                    |
| <p>Do you think the information in the video was true with a range from 0=not at all true to 6= completely true</p>                                 | <p>Were any parts of the video unclear or didn't make sense?</p>                                                                                                                                                                           | <p>How did this video make you feel about your back pain? (i.e. what emotions did you experience while watching the video?)</p> |

### *Participant timeline*

Participant progress through the study is shown in Figure 1. We will embed both video interventions into a survey which we will distribute online. Participants will access the survey via an anonymous link on social media channels Facebook, Twitter, Instagram and TikTok. The survey will include baseline questionnaires. Participants will be randomised to either of the intervention groups or the control group and then asked to complete primary and secondary outcomes. Participants randomised to each intervention group will be asked additional questions to evaluate the content of the videos.

### *Sample size*

We simulated multiple treatment and control comparisons using Dunnett's test to calculate the sample size assuming a difference in means 0.5 and standard deviation 3. Based on 2000 Monte Carlo samples from the null distributions we will require an average group size of 461 for a total sample size of 1383 to power a one-way design with two treatment groups and one control group. This design would achieve an any-pair power of 0.81 with an error rate of 0.05.

### *Recruitment*

Participants will be recruited through social media advertising. We will post an invitation to participate on the social media channels, Facebook, Twitter, Instagram and TikTok.

### Sequence generation, allocation concealment and blinding

Using the Qualtrics survey platform, [35] we will add a "randomiser" function to the survey flow. The "randomiser" element will automatically assign respondents to one of the three groups and the corresponding block of questions. A researcher not involved in this study will have access to the randomisation sequence. The participants will self-enrol in the trial. We will blind all members of the research team to group allocation. To maintain blinding, we will not disclose the specific aim of the trial to participants. Instead, we will invite participants to be involved with back pain related research.

### Data collection, management and analysis

The questionnaire will be electronic and data stored according to UNSW data security standards using Qualtrics. [35] Qualtrics allows for a direct export as a CSV file, which will then be uploaded to the R environment for statistical computing [36] for analysis.

We will analyse the data by intention-to-treat. We will use descriptive statistics to characterise the sample. We will report means and standard deviations for continuous variables. We will use frequencies and percentages to report categorical variables. For the primary and secondary outcomes, we compare between group means between all three arms of the trial using univariate analyses of variance (ANOVA).

We will conduct subgroup analyses to investigate whether the size or direction of the effect on the primary or secondary outcomes differs between people with and without low back pain and with low back pain of different durations and intensities.

### *Qualitative evaluation*

We will report the median and inter-quartile range (IQR) range for the helpfulness questions and present these data with box plots. We will count and report the percentage of positive responses to the engagement questions. We will perform a thematic analysis to understand participants experience of watching the video and triangulate these data with the

1  
2  
3 demographic, helpfulness and engagement data. These analyses may assist in understanding  
4 the relationship, if any, between demographic factors and the experience of watching the  
5 video.  
6  
7  
8  
9

### 10 Monitoring

11 Trial data integrity will be monitored by regularly scrutinising data files for omissions and  
12 errors. We will set up the questionnaire platform, Qualtrics, to ensure that participants  
13 respond to every question before proceeding. We do not anticipate any harms. A senior  
14 investigator not involved in the day to day administration of the trial will audit the trial  
15 weekly.  
16  
17  
18  
19  
20  
21

### 22 Ethics and dissemination

23 We obtained ethical approval from our institutions Human Research Ethics Committee  
24 (HREC), approval number HC210908. We will obtain informed consent from all participants  
25 before participating in the trial. Protocol amendments will be numbered and uploaded to the  
26 trial site on the Open Science Framework platform. Participants can remain anonymous. We  
27 will collect general demographic data only. All authors will declare declarations of interest.  
28 Data will be available on request from the corresponding author on completion of this trial.  
29 We will store data securely for seven years as directed by our institutional HREC. We will  
30 publish the results in a peer-reviewed medical journal. We will also publish the results on  
31 institution websites.  
32  
33  
34  
35  
36  
37  
38  
39  
40

### 41 Patient and public involvement

42 Consumers with low back pain were consulted throughout the design of the intervention  
43 process. Each major milestone of the intervention development was reviewed by members of  
44 the Musculoskeletal Health Consumer Community Council for Maridulu Budyari Gumal  
45 (SPHERE), before proceeding to the next stage. The consumer group provided suggestions  
46 which were implemented in the revised versions including changes to language and written  
47 text superimposed in both videos. We sought feedback from the consumer community  
48 council on the design of the survey to understand and minimise the burden of the intervention  
49 and the time required to participate. We will ask the consumer community council to assist  
50 with recruitment by sharing a link to the survey platform in their networks. We will continue  
51  
52  
53  
54  
55  
56  
57  
58  
59  
60

1  
2  
3 to consult with the consumer community council when disseminating the study results to  
4 assist with choosing what information and results to share and in what format.  
5  
6  
7  
8  
9  
10  
11  
12  
13  
14  
15  
16  
17  
18  
19  
20  
21  
22  
23  
24  
25  
26  
27  
28  
29  
30  
31  
32  
33  
34  
35  
36  
37  
38  
39  
40  
41  
42  
43  
44  
45  
46  
47  
48  
49  
50  
51  
52  
53  
54  
55  
56  
57  
58  
59  
60

For peer review only

### Competing interests

The authors have no known declarations.

### Funding

We received funding from Maridulu Budyari Gumal (SPHERE) for this project.

### Contributorship Statement

EO conceived the RCT, provided methodological expertise and wrote the protocol

ACT provided methodological expertise

SMS provided methodological expertise

SO provided methodological expertise

BMW provided methodological expertise

AGC provided methodological expertise

CMW provided methodological expertise

IAH provided methodological expertise

JHM is the guarantor and conceived the RCT, provided methodological and clinical area expertise

All authors read, contributed to and approved the final version of the manuscript

## References

- 1 Chan A, Tetzlaff JM, Altman DG. SPIRIT 2013 Statement : Defining Standard Protocol Items for Clinical Trials. *Ann Intern Med* 2016;**158**:200–7. doi:10.7326/0003-4819-158-3-201302050-00583.Requests
- 2 Kyu H, Abate D, Abate K, *et al.* Global , regional , and national disability-adjusted life-years ( DALYs ) for 359 diseases and injuries and healthy life expectancy ( HALE ) for 195 countries and territories , 1990 – 2017 : a systematic analysis for the Global Burden of Disease Study 201. *Lancet* 2018;**392**:1859–922. doi:10.1016/S0140-6736(18)32335-3
- 3 Collaborators G 2019 D and I. Global burden of 369 diseases and injuries in 204 countries and territories, 1990–2019: a systematic analysis for the Global Burden of Disease Study 2019. *Lancet* 2020;**396**:1204–22. doi:10.1016/S0140-6736(20)30925-9
- 4 Hartvigsen J, Hancock MJ, Kongsted A, *et al.* What low back pain is and why we need to pay attention. *Lancet* 2018;**391**:2356–67. doi:10.1016/S0140-6736(18)30480-X
- 5 Foster NE, Anema JR, Cherkin D, *et al.* Prevention and treatment of low back pain: evidence, challenges, and promising directions. *Lancet* Published Online First: 2018. doi:10.1016/S0140-6736(18)30489-6
- 6 Leake HB, Moseley GL, Stanton TR, *et al.* What do patients value learning about pain? A mixed methods survey on the relevance of target concepts following pain science education. *Pain* 2021;**162**:2558–68. doi:10.1097/j.pain.0000000000002244
- 7 O’Hagan ET, Di Pietro F, Traeger AC, *et al.* What messages predict intention to self-manage low back pain? A study of attitudes towards patient education. *Pain* Published Online First: 2022. doi:doi: 10.1097/j.pain.0000000000002530
- 8 Abenhaim L, Rossignol M, Gabeille D, *et al.* The prognostic consequences in the Making of the Initial Medical Diagnosis of Work-Related Back Injuries. *Spine (Phila Pa 1976)* 1995;**20**:791.
- 9 Black NM, Sullivan SJ, Mani R. A biopsychosocial understanding of lower back pain: Content analysis of online information. *Eur J Pain* 2017;:1–17. doi:10.1002/ejp.1158
- 10 Ferreira G, Traeger AC, Machado G, *et al.* Credibility, accuracy, and comprehensiveness of internet-based information about low back pain: A systematic review. *J Med Internet Res* 2019;**21**:1–10. doi:10.2196/13357
- 11 Munigangaiah S, Basavaraju N, Jadaan DY, *et al.* Do “Myths” of low back pain exist



- 1  
2  
3 among Irish population? A cross-sectional study. *Eur J Orthop Surg Traumatol*  
4 2016;**26**:41–6. doi:10.1007/s00590-015-1698-y  
5  
6  
7 12 Jenkins HJ, Hancock MJ, Maher CG, *et al.* Understanding patient beliefs regarding the  
8 use of imaging in the management of low back pain. *Eur J Pain (United Kingdom)*  
9 2016;**20**:573–80. doi:10.1002/ejp.764  
10  
11  
12 13 Werner EL, Ihlebaek C, Skouen JS, *et al.* Beliefs about low back pain in the  
13 Norwegian general population: are they related to pain experiences and health  
14 professionals? *Spine (Phila Pa 1976)* 2005;**30**:1770–6.  
15 doi:10.1097/01.brs.0000171909.81632.fe  
16  
17  
18 14 Christe G, Pizzolato V, Meyer M, *et al.* Unhelpful beliefs and attitudes about low back  
19 pain in the general population: A cross-sectional survey. *Musculoskelet Sci Pract*  
20 2021;**52**:102342. doi:10.1016/j.msksp.2021.102342  
21  
22  
23  
24 15 Hall A, Coombs D, Richmond H, *et al.* What do the general public believe about the  
25 causes, prognosis and best management strategies for low back pain? A cross-sectional  
26 study. *BMC Public Health* 2021;**21**:682. doi:10.1186/s12889-021-10664-5  
27  
28  
29 16 Buchbinder R, Underwood M, Hartvigsen J, *et al.* The Lancet Series call to action to  
30 reduce low value care for low back pain: an update. *Pain* 2020;**161**:S57–64.  
31 doi:10.1097/j.pain.0000000000001869  
32  
33  
34 17 Buchbinder R, Jolley D, Wyatt M. 2001 Volvo Award Winner in Clinical Studies:  
35 Effects of a media campaign on back pain beliefs and its potential influence on  
36 management of low back pain in general practice. *Spine (Phila Pa 1976)*  
37 2001;**26**:2535–42. doi:10.1097/00007632-200112010-00005  
38  
39  
40 18 Suman A, Armijo-olivo S, Deshpande S, *et al.* A systematic review of the  
41 effectiveness of mass media campaigns for the management of low back pain. *Disabil*  
42 *Rehabil* 2020;:1–29. doi:10.1080/09638288.2020.1743777  
43  
44  
45 19 Mm B, Strzeszynski L. Mass media interventions for smoking cessation in adults (   
46 Review ). Published Online First: 2017.  
47 doi:10.1002/14651858.CD004704.pub4.www.cochranelibrary.com  
48  
49  
50 20 Grilli R, Ramsay C, Minozzi S. Mass media interventions: e cts on health services  
51 utilisation (Review). Published Online First: 2002.  
52 doi:10.1002/14651858.CD000389.www.cochranelibrary.com  
53  
54  
55 21 Buchbinder R, Jolley D, Wyatt M. Population based intervention to change back pain  
56 beliefs and disability: three part evaluation. *BMJ Br Med J* 2001;**322**:1516–  
57  
58  
59  
60

- 1  
2  
3 20.<http://www.bmj.com/content/bmj/322/7301/1516.full.pdf> (accessed 19 Mar 2018).
- 4  
5 22 Werner EL, Ihlebæk C, Lærum E, *et al*. Low back pain media campaign: No effect on  
6 sickness behaviour. *Patient Educ Couns* 2008;**71**:198–203.  
7  
8 doi:10.1016/j.pec.2007.12.009  
9
- 10 23 Werner EL, Gross DP. The effects of a media campaign on beliefs and utilization of  
11 imaging examinations in Norwegian patients with low back pain. 2009.
- 12  
13 24 Waddell G, O'Connor M, Boorman S, *et al*. Working Backs Scotland: A Public and  
14 Professional Health Education Campaign for Back Pain. *Spine (Phila Pa 1976)*  
15 2007;**32**:2139.  
16  
17 25 Cunningham CG, Flynn TA, Toole CM, *et al*. Working Backs Project —  
18 implementing low back pain guidelines. 2008;:580–3. doi:10.1093/occmed/kqn116  
19  
20 26 Gross DP, Russell AS, Ferrari R, *et al*. Evaluation of a Canadian back pain mass media  
21 campaign. *Spine (Phila Pa 1976)* 2010;**35**:906–13.  
22  
23 doi:10.1097/BRS.0b013e3181c91140  
24  
25 27 Capurro D, Cole K, Echavarría MI, *et al*. The Use of Social Networking Sites for  
26 Public Health Practice and Research: A Systematic Review. *J Med Internet Res*  
27 2014;**16**. doi:10.2196/jmir.2679  
28  
29 28 Vivid Social. Social Media Statistics Australia – January 2021.  
30  
31 <https://www.socialmedianews.com.au/social-media-statistics-australia-january-2021/>  
32 (accessed 7 Jul 2020).  
33  
34 29 Kim HS. Attracting Views and Going Viral: How Message Features and News-  
35 Sharing Channels Affect Health Diffusion. *J Commun* 2015;**65**:512–34.  
36  
37 doi:10.1111/jcom.12160.Attracting  
38  
39 30 Yammine BS. Fight Coronavirus Misinformation. Using social media to spread good  
40 pandemic science. *Nature* 2020;**581**:345.  
41  
42 31 Moorhead SA, Hazlett DE, Harrison L, *et al*. A new dimension of health care:  
43 Systematic review of the uses, benefits, and limitations of social media for health  
44 communication. *J Med Internet Res* 2013;**15**:1–17. doi:10.2196/jmir.1933  
45  
46 32 Neiger BL, Thackeray R, Wagenen SA Van, *et al*. Use of Social Media in Health  
47 Promotion: Purposes, Key Performance Indicators, and Evaluation Metrics. *Health*  
48 *Promot Pract* 2012;**13**:159–64. doi:10.1177/1524839911433467  
49  
50 33 Nicholas M. Pain self efficacy questionnaire (PSEQ). ... *Univ Sydney Pain Manag*  
51 *Res ...* 1994;:5–6.<http://www.tac.vic.gov.au/files-to->  
52  
53  
54  
55  
56  
57  
58  
59  
60

- 1  
2  
3  
4  
5  
6  
7  
8  
9  
10  
11  
12  
13  
14  
15  
16  
17  
18  
19  
20  
21  
22  
23  
24  
25  
26  
27  
28  
29  
30  
31  
32  
33  
34  
35  
36
- move/media/upload/pain\_self\_efficacy\_questionnaire.pdf
- 34 O'Hagan ET, Skinner IW, Jones MD, *et al.* Development and Measurement Properties of the AxEL (Attitude toward Education and advice for Low back pain) Questionnaire. *BMC Heal Qual Life Outcomes* 2022;**20**. doi:<https://doi.org/10.1186/s12955-021-01908-4>
- 35 Smith R, Orgill S, Smith SM, *et al.* Qualtrics XM// The Leading Experience Management Software. 2002.<https://www.qualtrics.com>
- 36 Team RC. R: A language and environment for statistical computing (Version 3.4.2)[Computer software]. In: *R: A language and environment for statistical computing*. R Foundation for Statistical Computing. Vienna, Austria: 2012. <http://www.r-project.org/>

1  
2  
3 **Figure 1- Participant progress through the study**  
4  
5  
6  
7  
8  
9  
10  
11  
12  
13  
14  
15  
16  
17  
18  
19  
20  
21  
22  
23  
24  
25  
26  
27  
28  
29  
30  
31  
32  
33  
34  
35  
36  
37  
38  
39  
40  
41  
42  
43  
44  
45  
46  
47  
48  
49  
50  
51  
52  
53  
54  
55  
56  
57  
58  
59  
60

For peer review only

1  
2  
3  
4  
5  
6  
7  
8  
9  
10  
11  
12  
13  
14  
15  
16  
17  
18  
19  
20  
21  
22  
23  
24  
25  
26  
27  
28  
29  
30  
31  
32  
33  
34  
35  
36  
37  
38  
39  
40  
41  
42  
43  
44  
45  
46  
47  
48  
49  
50  
51  
52  
53  
54  
55  
56  
57  
58  
59  
60

**Figure 1- Participant progress through the study**

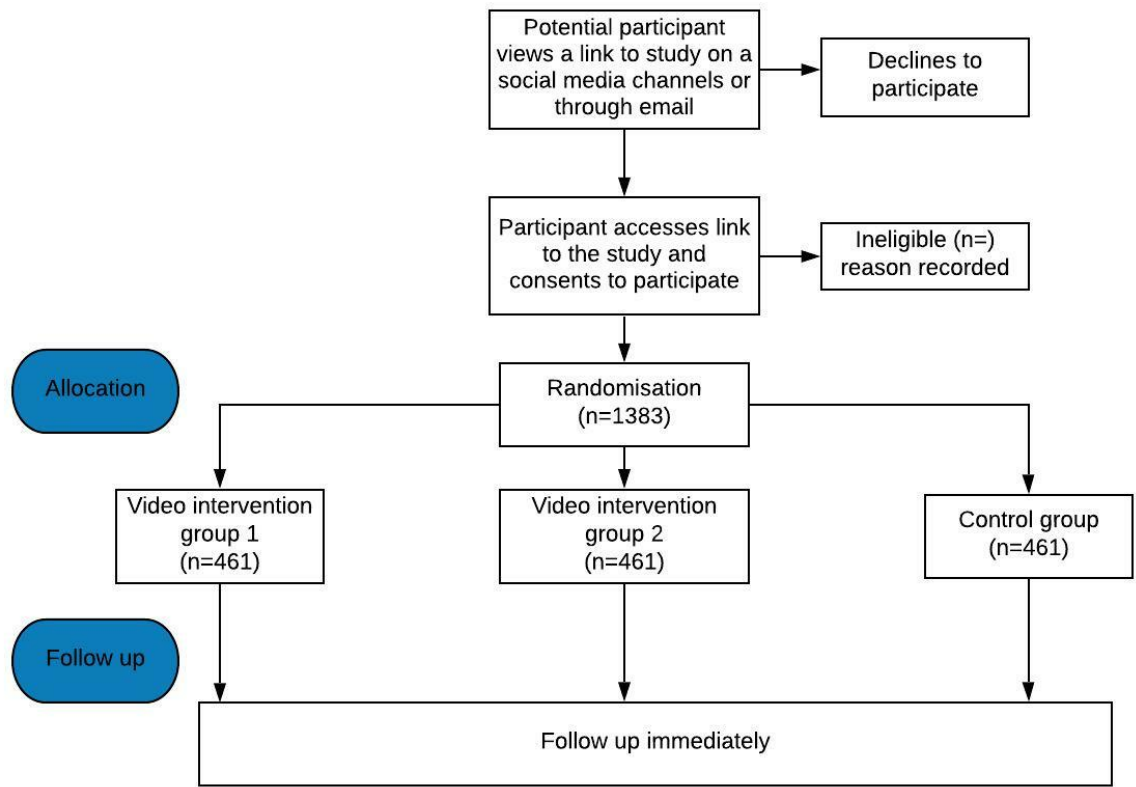

view only

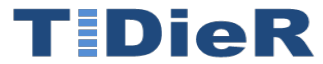

Template for Intervention  
Description and Replication

## The TIDieR (Template for Intervention Description and Replication) Checklist\*:

Information to include when describing an intervention and the location of the information

| Item<br>number | Item                                                                                                                                                                                                                                                                                                                                                                                                                                                                                                                                                                                                          | Where located **                              |                   |
|----------------|---------------------------------------------------------------------------------------------------------------------------------------------------------------------------------------------------------------------------------------------------------------------------------------------------------------------------------------------------------------------------------------------------------------------------------------------------------------------------------------------------------------------------------------------------------------------------------------------------------------|-----------------------------------------------|-------------------|
|                |                                                                                                                                                                                                                                                                                                                                                                                                                                                                                                                                                                                                               | Primary paper<br>(page or appendix<br>number) | Other † (details) |
|                | <b>BRIEF NAME</b>                                                                                                                                                                                                                                                                                                                                                                                                                                                                                                                                                                                             |                                               |                   |
| 1.             | A video designed for dissemination on social media to increase people's confidence becoming more active despite back pain.                                                                                                                                                                                                                                                                                                                                                                                                                                                                                    | 1                                             | _____             |
|                | <b>WHY</b>                                                                                                                                                                                                                                                                                                                                                                                                                                                                                                                                                                                                    |                                               |                   |
| 2.             | A carefully considered, engaging social media message could provide a low-cost alternative to deliver a media campaign about low back pain.                                                                                                                                                                                                                                                                                                                                                                                                                                                                   | 3, 4                                          | _____             |
|                | <b>WHAT</b>                                                                                                                                                                                                                                                                                                                                                                                                                                                                                                                                                                                                   |                                               |                   |
| 3.             | Materials: The scientists involved in this study met to identify the most important message to be communicated to the general public about low back pain. Next, the scientists met with designers at an advertising agency to discuss and formalise a brief for the intervention. The advertising agency produced three initial storyboards to satisfy the brief for the video intervention, of which, one idea was refined over a series of meetings between the scientists and designers to form two video interventions used in this study.                                                                | 4, 5                                          | _____             |
|                | Before deciding on the final content and format the researchers presented the proposed video interventions to a consumer group for review. The consumer group recommend some changes to the language used in the superimposed text in both videos.                                                                                                                                                                                                                                                                                                                                                            |                                               |                   |
| 4.             | Procedures:                                                                                                                                                                                                                                                                                                                                                                                                                                                                                                                                                                                                   | 5                                             | _____             |
|                | The final version of each video intervention is between 2 and 3 minutes long. Both follow the same narrative, that scientists would like to reassure the public that low back pain is common, but evidence suggests that it is safe to move despite back pain. The featured scientists report that they are unsure of how to convey this message to the public, which leads to the introduction of designers at the advertising agency brainstorming how to help deliver the message that it is safe to move. The advertising agency personnel suggest a dance. The video cuts back to the scientists who are |                                               |                   |

1  
2  
3  
4  
5  
6  
7  
8  
9  
10  
11  
12  
13  
14  
15  
16  
17  
18  
19  
20  
21  
22  
23  
24  
25  
26  
27  
28  
29  
30  
31  
32  
33  
34  
35  
36  
37  
38  
39  
40  
41  
42  
43  
44  
45  
46

reluctant to endorse one specific movement, such as dance and conclude that it does not matter what you do as long as you move. The video concludes with the text, "It's safe to move", "Your backbone has backbone". The second video is exactly the same as the first, except when the advertising agency recommends the dance, the scientists try it out and to add humour, there are some video clips of the scientists dancing.

**WHO PROVIDED**

5. Participants will access the survey via an email or an anonymous link on social media. 7

**HOW**

6. The video will run as an item in the survey, that the participant will click to access as part of survey process. 7

**WHERE**

7. Each intervention will be delivered online. 7

**WHEN and HOW MUCH**

8. Each intervention will be delivered, immediately after obtaining consent. Participants will have access to the allocated video intervention once. 8

**TAILORING**

9. The researcher team will conduct a qualitative evaluation to enable tailoring of the intervention in future. 9

**MODIFICATIONS**

10.\* If the intervention was modified during the course of the study, describe the changes (what, why, when, and how). NA

**HOW WELL**

11. Planned: If intervention adherence or fidelity was assessed, describe how and by whom, and if any strategies were used to maintain or improve fidelity, describe them. NA

12.\* Actual: If intervention adherence or fidelity was assessed, describe the extent to which the intervention was delivered as planned. NA

1 \*\* **Authors** - use N/A if an item is not applicable for the intervention being described. **Reviewers** – use ‘?’ if information about the element is not reported/not  
2 sufficiently reported.  
3

4 † If the information is not provided in the primary paper, give details of where this information is available. This may include locations such as a published protocol  
5 or other published papers (provide citation details) or a website (provide the URL).  
6

7 ‡ If completing the TIDieR checklist for a protocol, these items are not relevant to the protocol and cannot be described until the study is complete.

8 \* We strongly recommend using this checklist in conjunction with the TIDieR guide (see *BMJ* 2014;348:g1687) which contains an explanation and elaboration for  
9 each item.  
10

11 \* The focus of TIDieR is on reporting details of the intervention elements (and where relevant, comparison elements) of a study. Other elements and methodological  
12 features of studies are covered by other reporting statements and checklists and have not been duplicated as part of the TIDieR checklist. When a **randomised**  
13 **trial** is being reported, the TIDieR checklist should be used in conjunction with the CONSORT statement (see [www.consort-statement.org](http://www.consort-statement.org)) as an extension of **Item**  
14 **5 of the CONSORT 2010 Statement**. When a **clinical trial protocol** is being reported, the TIDieR checklist should be used in conjunction with the SPIRIT  
15 statement as an extension of **Item 11 of the SPIRIT 2013 Statement** (see [www.spirit-statement.org](http://www.spirit-statement.org)). For alternate study designs, TIDieR can be used in  
16 conjunction with the appropriate checklist for that study design (see [www.equator-network.org](http://www.equator-network.org)).  
17  
18  
19  
20  
21  
22  
23  
24  
25  
26  
27  
28  
29  
30  
31  
32  
33  
34  
35  
36  
37  
38  
39  
40  
41  
42



# BMJ Open

**It's ok to move! A protocol for a randomised controlled trial investigating the effect of a video designed to increase people's confidence becoming more active despite back pain.**

|                                 |                                                                                                                                                                                                                                                                                                                                                                                                                                                                                                                                                                                                                                                                                                                                                                                                                                                                                                                                                                                                                                                                                                                                                                                                                                                                                                                                                                                                                                                     |
|---------------------------------|-----------------------------------------------------------------------------------------------------------------------------------------------------------------------------------------------------------------------------------------------------------------------------------------------------------------------------------------------------------------------------------------------------------------------------------------------------------------------------------------------------------------------------------------------------------------------------------------------------------------------------------------------------------------------------------------------------------------------------------------------------------------------------------------------------------------------------------------------------------------------------------------------------------------------------------------------------------------------------------------------------------------------------------------------------------------------------------------------------------------------------------------------------------------------------------------------------------------------------------------------------------------------------------------------------------------------------------------------------------------------------------------------------------------------------------------------------|
| Journal:                        | <i>BMJ Open</i>                                                                                                                                                                                                                                                                                                                                                                                                                                                                                                                                                                                                                                                                                                                                                                                                                                                                                                                                                                                                                                                                                                                                                                                                                                                                                                                                                                                                                                     |
| Manuscript ID                   | bmjopen-2022-063250.R1                                                                                                                                                                                                                                                                                                                                                                                                                                                                                                                                                                                                                                                                                                                                                                                                                                                                                                                                                                                                                                                                                                                                                                                                                                                                                                                                                                                                                              |
| Article Type:                   | Protocol                                                                                                                                                                                                                                                                                                                                                                                                                                                                                                                                                                                                                                                                                                                                                                                                                                                                                                                                                                                                                                                                                                                                                                                                                                                                                                                                                                                                                                            |
| Date Submitted by the Author:   | 17-Jun-2022                                                                                                                                                                                                                                                                                                                                                                                                                                                                                                                                                                                                                                                                                                                                                                                                                                                                                                                                                                                                                                                                                                                                                                                                                                                                                                                                                                                                                                         |
| Complete List of Authors:       | O'Hagan, Edel; Neuroscience Research Australia, Centre for Pain IMPACT; University of New South Wales, Prince of Wales Clinical School<br>Traeger, Adrian; The University of Sydney Faculty of Medicine and Health, Institute for Musculoskeletal Health, Sydney School of Public Health<br>Schabrun, Siobhan; Neuroscience Research Australia, Centre for Pain IMPACT<br>O'Neill, Sean; University of New South Wales, South Western Sydney Clinical School, Liverpool Hospital; The University of Sydney, Institute of Bone and Joint Research, Kolling Institute<br>Wand, Benedict; The University of Notre Dame Australia, Faculty of Medicine, Nursing & Midwifery and Health Sciences<br>Cashin, Aidan; Neuroscience Research Australia, Centre for Pain IMPACT; University of New South Wales, School of Health Sciences, Faculty of Medicine and Health<br>Williams, Christopher; Hunter Medical Research Institute, University of Newcastle, School of Medicine and Public Health; Hunter New England Local Health District, Population Health<br>Harris, Ian A; The University of Sydney Institute for Musculoskeletal Health, School of Public Health, Faculty of Medicine; University of New South Wales, South Western Sydney Clinical School, Liverpool Hospital<br>McAuley, James; Neuroscience Research Australia, Centre for Pain IMPACT; University of New South Wales, School of Health Sciences, Faculty of Medicine and Health |
| <b>Primary Subject Heading</b>: | Communication                                                                                                                                                                                                                                                                                                                                                                                                                                                                                                                                                                                                                                                                                                                                                                                                                                                                                                                                                                                                                                                                                                                                                                                                                                                                                                                                                                                                                                       |
| Secondary Subject Heading:      | Public health                                                                                                                                                                                                                                                                                                                                                                                                                                                                                                                                                                                                                                                                                                                                                                                                                                                                                                                                                                                                                                                                                                                                                                                                                                                                                                                                                                                                                                       |
| Keywords:                       | Pain management < ANAESTHETICS, World Wide Web technology < BIOTECHNOLOGY & BIOINFORMATICS, Back pain < ORTHOPAEDIC & TRAUMA SURGERY                                                                                                                                                                                                                                                                                                                                                                                                                                                                                                                                                                                                                                                                                                                                                                                                                                                                                                                                                                                                                                                                                                                                                                                                                                                                                                                |
|                                 |                                                                                                                                                                                                                                                                                                                                                                                                                                                                                                                                                                                                                                                                                                                                                                                                                                                                                                                                                                                                                                                                                                                                                                                                                                                                                                                                                                                                                                                     |

1  
2  
3  
4  
5  
6  
7  
8  
9  
10  
11  
12  
13  
14  
15  
16  
17  
18  
19  
20  
21  
22  
23  
24  
25  
26  
27  
28  
29  
30  
31  
32  
33  
34  
35  
36  
37  
38  
39  
40  
41  
42  
43  
44  
45  
46  
47  
48  
49  
50  
51  
52  
53  
54  
55  
56  
57  
58  
59  
60

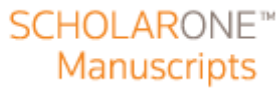

**It's ok to move! A protocol for a randomised controlled trial investigating the effect of a video designed to increase people's confidence becoming more active despite back pain.**

Edel T O'Hagan<sup>1 2 3</sup>

Adrian C Traeger<sup>4</sup>

Siobhan M Schabrun<sup>1 3</sup>

Sean O'Neill<sup>3 5 6</sup>

Benedict M Wand<sup>7</sup>

Aidan G Cashin<sup>1 8</sup>

Christopher M Williams<sup>4</sup>

Ian A Harris<sup>3 4 5 9</sup>

James H McAuley<sup>1 8</sup>

1 Centre for Pain IMPACT, Neuroscience Research Australia, Sydney, New South Wales, Australia

2 Prince of Wales Clinical School, University of New South Wales, Sydney, New South Wales, Australia

3 Maridulu Budyari Gumal

4 Institute for Musculoskeletal Health, Sydney School of Public Health, Faculty of Medicine and Health, The University of Sydney, Sydney, New South Wales, Australia.

5 South Western Sydney Clinical School, Liverpool Hospital, The University of New South Wales, Sydney, New South Wales, Australia

6 Institute of Bone and Joint Research, Kolling Institute, The University of Sydney, Sydney, New South Wales, Australia

7 Faculty of Medicine, Nursing & Midwifery and Health Sciences, The University of Notre Dame Australia, Fremantle, Western Australia, Australia

8 School of Health Sciences, Faculty of Medicine and Health, University of New South Wales, Sydney, New South Wales, Australia

9 Ingham Institute of Applied Medical Research, Liverpool, Sydney, New South Wales, Australia

1  
2  
3 **Correspondence and requests for reprints to Edel O'Hagan, NeuRA, 139 Barker Street,**  
4 **Randwick 2031 NSW. Australia. Phone: +61(2) 93991618 Email:**

5 [e.ohagan@neura.edu.au](mailto:e.ohagan@neura.edu.au); [edel.ohagan@sydney.edu.au](mailto:edel.ohagan@sydney.edu.au)  
6  
7  
8  
9

### 10 **Trial Registration**

11  
12  
13 The trial is registered with the Australia New Zealand Clinical Trials Registry (ANZCTR)

14 Trial Id: ACTRN12622000466741

15 The protocol is uploaded to the Open Science Framework website, under embargo.

16  
17 <https://osf.io/c7j8t/>  
18  
19  
20

### 21 **Protocol**

22  
23  
24 This protocol is reported following the SPIRIT checklist. This is protocol version 1.  
25  
26  
27  
28  
29  
30  
31  
32  
33  
34  
35  
36  
37  
38  
39  
40  
41  
42  
43  
44  
45  
46  
47  
48  
49  
50  
51  
52  
53  
54  
55  
56  
57  
58  
59  
60

## 1 **Abstract**

## 2 **Introduction**

3 Social media provide promising contemporary platforms for sharing public health  
4 information with a broad audience. Before implementation, testing social media campaigns  
5 that are intended to engage audiences and initiate behaviour change is necessary. This trial  
6 aims to investigate the effectiveness of a public health campaign to increase people's  
7 confidence in becoming more active despite low back pain in comparison with no  
8 intervention.

## 9 **Methods and analysis**

10 This is an online randomised controlled trial with two intervention groups and one control  
11 group in a 1:1:1 allocation. People over 18 years of age and fluent in English will be recruited  
12 via social media advertising. We developed a social media-based public health campaign to  
13 support recommendations for managing low back pain. The interventions are two videos.  
14 Participants in the control group will be asked questions about low back pain but will not  
15 view either video intervention. The primary outcome will be item 10 of the pain self-efficacy  
16 questionnaire, which asks participants to rate how confident they would feel to gradually  
17 become more active despite pain ranging from 0 (not at all confident) to 6 (completely  
18 confident). This outcome will be measured immediately in all participant groups. We will  
19 compare group means of the three arms of the trial using univariate analyses of variance.

## 20 **Ethics and dissemination**

21 This trial has been prospectively registered with the Australian New Zealand Clinical Trials  
22 Registry. We obtained ethical approval from our institutions Human Research Ethics  
23 Committee (HREC) before data collection. We will publish the results in a peer-reviewed  
24 medical journal and on institution websites.

1  
2  
3 25 **Strengths and limitations**  
4  
5

- 6 26 • This randomised controlled trial will investigate a new, simple, inexpensive approach  
7 to delivering a public health message about low back pain on a large scale  
8 27  
9 28 • A randomised controlled design allows for testing an intervention before being widely  
10 disseminated, which is not typical of mass media campaigns  
11 29  
12 30 • An entirely online randomised controlled trial allows participation across the world to  
13 increase the generalisability of the results  
14 31  
15 32 • We will include qualitative methods to understand how to optimise the intervention  
16  
17 33 • We will investigate the effect on proximal outcomes only, therefore have a limited  
18 insight into the effect on distal outcomes such as healthcare use  
19 34  
20  
21  
22  
23  
24 35  
25  
26  
27  
28  
29  
30  
31  
32  
33  
34  
35  
36

## 37 **Introduction**

### 38 Background and rationale

39 Low back pain is common and burdensome. The point prevalence of activity-limiting low  
40 back pain lasting more than one day is 7.8%, meaning that 577 million people have low back  
41 pain at any one time across the world. [1] Low back pain is the leading cause of disability  
42 worldwide, causing one of the largest absolute increases in the number of days lost to  
43 disability of any health condition over the last 20 years. [2] Experts from The Lancet Low  
44 Back Pain Series Working Group predict the cost of low back pain will continue to escalate.  
45 [3] Large scale initiatives are necessary to stem the cost of this global public health concern.  
46 [4]

48 Recent research suggests that people with low back pain value learning about causes of low  
49 back pain, [5] and people with low back pain who accept evidence-based messages, such as,  
50 pain does not equal damage, are likely to intend to self-manage their low back pain. [6] Yet,  
51 inaccurate information is common in community healthcare settings [7] and on health web-  
52 sites. [8] [9] Population based surveys conducted in Ireland, [10] Australia, [11] Norway,  
53 [12] Switzerland [13] and Canada [14] highlighted that an unhelpful, medicalised view of  
54 back pain is common. Challenging unhelpful beliefs about low back pain was identified as  
55 one of top ten priorities for researchers, considered vital to reverse the alarming global rise in  
56 low back pain disability and health care costs. [15]

58 One approach that has been successful at decreasing low back pain related costs on a large  
59 scale are mass media campaigns [16] [17] that deliver a public health message to a broad  
60 audience. [18] [19] An Australian mass media public health campaign effectively changed  
61 beliefs about low back pain and reduced associated costs.[16] [20] However, similar  
62 campaigns in Norway, [21] [22] Scotland, [23] Ireland, [24] and Canada [25] failed to  
63 demonstrate any impact on low back pain related health costs. One factor evident in the  
64 successful Australian campaign was the broad reach; the campaign reached 86% of the target  
65 population. [17] Social media provide promising contemporary platforms for sharing public  
66 health information with a broad audience. [26] Social media campaigns have the capacity for  
67 broad reach as there are 3.8 billion active social media users worldwide. [27] When a social  
68 media campaign is engaging, it can generate increasing likes and shares, termed "viral". [28]

1  
2  
3 69 A viral campaign creates a self-proliferating message, further extending reach. [28] [29] A  
4  
5 70 poorly developed campaign could fail to engage the targeted group. [30] A recent process  
6  
7 71 evaluation of health communication and promotion campaigns on social media found that  
8  
9 72 campaigns often do not sufficiently engage audiences to impact health behaviour. [31] Before  
10  
11 73 implementation, testing social media campaigns intended to engage audiences and initiate  
12  
13 74 behaviour change is necessary.  
14

75

15 76 In this trial, we will investigate the effectiveness of a campaign about low back pain  
16  
17 77 compared to no intervention at improving an essential domain of pain-related self-efficacy.  
18  
19 78 We will conduct qualitative testing, including evaluating engagement to maximise the impact  
20  
21 79 of delivering a reassuring message about low back pain using social media.  
22

## 23 80 Objective

24  
25 81 This trial aims to investigate the effectiveness of a public health campaign to increase  
26  
27 82 people's confidence in becoming more active despite low back pain in comparison with no  
28  
29 83 intervention.  
30

## 31 32 84 Trial design

33  
34 85 This trial is a three-group, parallel, randomised controlled trial (RCT) with two intervention  
35  
36 86 groups and one control group in a 1:1:1 allocation. This protocol is reported following the  
37  
38 87 SPIRIT checklist. [32]  
39

## 40 41 88 **Methods**

### 42 43 44 89 Participants and interventions and outcomes

#### 45 46 47 90 *Study setting:*

48  
49 91 This will be an online community-based global trial. Participants will be recruited via social  
50  
51 92 media advertising.  
52

#### 53 54 93 *Eligibility criteria:*

55  
56 94 People will be eligible for inclusion in this RCT if they are over 18 years of age and able to  
57  
58 95 understand spoken and written English.  
59  
60



## 96 *Interventions*

97 In collaboration with an advertising agency, VMLY&R, we developed a public health  
98 campaign, delivered by social media, to support recommendations for managing low back  
99 pain. The interventions comprise of videos described in brief below and in more detail in  
100 accordance with the TIDieR checklist in Appendix 1.

101

102 The video interventions are between 2 and 3 minutes long. Both follow the same narrative  
103 that scientists would like to reassure the public that low back pain is common, and that  
104 evidence suggests it is safe to move despite back pain. In addition our previous evidence  
105 suggested the value of providing validation to people experiencing low back pain. [33] The  
106 earlier results showed that people seek validation on social media, one interpretation is due to  
107 feeling dismissed or invalidated by clinicians. We aimed to increase the credibility of the  
108 information and provide validation by using scientists and clinicians to narrate the video.  
109 The featured scientists report that they are unsure of how to convey these messages to the  
110 public, which leads to designers at the advertising agency brainstorming how to help deliver  
111 the key message that it is safe to move. The advertising agency personnel suggest a dance.  
112 The video cuts back to the scientists who are reluctant to endorse one specific movement,  
113 such as a dance and conclude that it does not matter what you do as long as you move. The  
114 video ends with the superimposed text, "It's safe to move", "Your backbone has backbone".  
115 The second video is the same as the first, except that when the advertising agency suggests  
116 the dance, the scientists try it out and to add humour, there are some video clips of the  
117 scientists dancing.

118

119 Participants in the control group will not view either video intervention. The video  
120 interventions will be uploaded to the study page on the Open Science Framework website  
121 (<https://osf.io/c7j8t/>). They will be embargoed until after the trial is completed.

## 122 *Outcomes*

123 We will conduct both a quantitative and qualitative evaluation. When completing the  
124 outcomes, those without low back pain will be presented with a scenario where they have low  
125 back pain. In addition to the primary and secondary outcomes, participants randomised to  
126 either video intervention group will be asked additional questions regarding the video  
127 content, their engagement level, and overall experience.

1  
2  
3 128 *Baseline questionnaires*

4  
5 129 Baseline questionnaires will include questions on age and gender. In addition, we will ask  
6  
7 130 participants about the presence of low back pain, pain intensity over the preceding 24-hours  
8  
9 131 and the duration of the current episode of low back pain.

10  
11 132 *Primary outcome*

12  
13 133 The intervention is intended to increase a person's confidence (or self-efficacy) that they can  
14  
15 134 move safely despite low back pain. The primary outcome is therefore is item 10 of the Pain  
16  
17 135 Self-Efficacy Questionnaire (PSEQ) [26], a commonly used measure of self-efficacy for  
18  
19 136 people with chronic pain. [34] A Rasch analysis of the PSEQ investigated each question to  
20  
21 137 identify the extent to which a positive answer to that question reflected the attribute (self-  
22  
23 138 efficacy).[35] The authors determined that item 10, 'increasing confidence becoming more  
24  
25 139 active', was easiest for participants to endorse.[35] meaning, an optimal "self-efficacy"  
26  
27 140 intervention should target that item. Item 10 of the PSEQ asks participants to rate how  
28  
29 141 confident they would feel to gradually become more active despite the pain with a range from  
30  
31 142 0 (not at all confident) to 6 (completely confident). Improving self-efficacy may facilitate  
32  
33 143 symptom management, a proximal component of the broader, distal target of self-  
34  
35 144 management. [33]

36  
37 145 *Secondary outcome*

38  
39 146 The secondary outcomes will be Factor 1 of the AxEL-Q Questionnaire. [36] The AxEL-Q is  
40  
41 147 a questionnaire designed to assess attitudes toward first-line care for low back pain, Factor 1  
42  
43 148 comprises nine items and evaluates *Attitude toward staying active*. The score range for Factor  
44  
45 149 1 is 0 to 54, with higher scores indicating a more positive attitude toward messages about  
46  
47 150 staying active. This outcome will be measured immediately in all participant groups.

48  
49 151 *Qualitative evaluation*

50  
51 152 We will conduct a mixed-methods qualitative evaluation consisting of three parts. Firstly, to  
52  
53 153 understand the helpfulness of the video, we will ask participants four questions rated on a 7-  
54  
55 154 point Numeric Rating Scale. Secondly, we will evaluate engagement with the video by asking  
56  
57 155 participants six Yes/No questions. Finally, we will ask participants four open-ended questions  
58  
59 156 to understand their experience watching the video. The questions included in the qualitative  
60  
157 evaluation are outlined in Table 1.

158 **Table 1- Questions that participants will be asked to understand engagement with video**  
 159 **interventions**

| <b>Helpfulness of the video</b><br><i>(rated on a 7-point Numeric Rating Scale)</i>                                                          | <b>Engagement with the video</b><br><i>(Yes/No)</i>                                                                                                                                                                                 | <b>Experience of watching the video</b><br><i>(Open-ended)</i>                                                           |
|----------------------------------------------------------------------------------------------------------------------------------------------|-------------------------------------------------------------------------------------------------------------------------------------------------------------------------------------------------------------------------------------|--------------------------------------------------------------------------------------------------------------------------|
| Overall, did you find this video helpful, with a range from 0=not at all helpful to 6=extremely helpful                                      | Did you like the video?                                                                                                                                                                                                             | If any, what aspects were unclear to you?                                                                                |
| The information in the video was relevant to me, with a range from 0=not at all relevant to 6=extremely relevant                             | If you noticed this video in your social media feed, would you view it?<br><br>If you viewed this video on your feed or timeline would "like" it?<br><br>If you saw this video on your feed or timeline would share or re-tweet it? | What new things did you learn?                                                                                           |
| How much of the information in the video was NEW information for you, with a range from 0=no new information 6=great deal of new information | After watching the video, are you any less likely to request imaging (e.g. x-ray or MRI) for back pain?                                                                                                                             | What did you dislike?                                                                                                    |
| Do you think the information in the video was true with a range from 0=not at all true to 6= completely true                                 | Were any parts of the video unclear or didn't make sense?                                                                                                                                                                           | How did this video make you feel about your back pain? (i.e. what emotions did you experience while watching the video?) |

160 *Participant timeline*

161 Participant progress through the study is shown in Figure 1. We will embed both video  
 162 interventions into a survey which we will distribute online. Participants will access the survey  
 163 via an anonymous link on social media channels Facebook, Twitter, Instagram and TikTok.  
 164 The survey will include baseline questionnaires. Participants will be randomised to either of  
 165 the intervention groups or the control group and then asked to complete primary and  
 166 secondary outcomes. Participants randomised to each intervention group will be asked  
 167 additional questions to evaluate the content of the videos.

1  
2  
3 168 *Sample size*  
4

5 169 We simulated multiple treatment and control comparisons using Dunnett's test to calculate  
6  
7 170 the sample size assuming a difference in means 0.5 and standard deviation 3. Based on 2000  
8  
9 171 Monte Carlo samples from the null distributions we will require an average group size of 461  
10  
11 172 for a total sample size of 1383 to power a one-way design with two treatment groups and one  
12  
13 173 control group. This design would achieve an any-pair power of 0.81 with an error rate of  
14  
15 174 0.05.  
16

17 175 *Recruitment*  
18

19 176 Participants will be recruited through social media advertising. We will post an invitation to  
20  
21 177 participate on the social media channels, Facebook, Twitter, Instagram and TikTok.  
22

23  
24 178 Sequence generation, allocation concealment and blinding  
25

26 179 Using the Qualtrics survey platform, [37] we will add a "randomiser" function to the survey  
27  
28 180 flow. The "randomiser" element will automatically assign respondents to one of the three  
29  
30 181 groups and the corresponding block of questions. A researcher not involved in this study will  
31  
32 182 have access to the randomisation sequence. The participants will self-enrol in the trial. We  
33  
34 183 will blind all members of the research team to group allocation. To maintain blinding, we will  
35  
36 184 not disclose the specific aim of the trial to participants. Instead, we will invite participants to  
37  
38 185 be involved with back pain related research.  
39

40 186 Data collection, management and analysis  
41

42 187 The questionnaire will be electronic and data stored according to UNSW data security  
43  
44 188 standards using Qualtrics. [37] Qualtrics allows for a direct export as a CSV file, which will  
45  
46 189 then be uploaded to the R environment for statistical computing [38] for analysis.  
47

48 190  
49 191 We will analyse the data by intention-to-treat. We will use descriptive statistics to  
50  
51 192 characterise the sample. We will report means and standard deviations for continuous  
52  
53 193 variables. We will use frequencies and percentages to report categorical variables. For the  
54  
55 194 primary and secondary outcomes, we compare between group means between all three arms  
56  
57 195 of the trial using univariate analyses of variance (ANOVA).  
58  
59 196  
60

1  
2  
3 197 We will conduct subgroup analyses to investigate whether the size or direction of the effect  
4  
5 198 on the primary or secondary outcomes differs between people with and without low back  
6  
7 199 pain and with low back pain of different durations and intensities.

8  
9  
10 200 *Qualitative evaluation*

11 201 We will report the median and inter-quartile range (IQR) range for the helpfulness questions  
12  
13 202 and present these data with box plots. We will count and report the percentage of positive  
14  
15 203 responses to the engagement questions. We will perform a thematic analysis to understand  
16  
17 204 participants experience of watching the video and triangulate these data with the  
18  
19 205 demographic, helpfulness and engagement data. We expect brief one line responses from  
20  
21 206 these questions, that would facilitate a qualitative analysis that is useful but not onerous.  
22  
23 207 These analyses may assist in understanding the relationship, if any, between demographic  
24  
25 208 factors and the experience of watching the video.

26  
27 209 Monitoring

28  
29 210 Trial data integrity will be monitored by regularly scrutinising data files for omissions and  
30  
31 211 errors. We will set up the questionnaire platform, Qualtrics, to ensure that participants  
32  
33 212 respond to every question before proceeding. We do not anticipate any harms. A senior  
34  
35 213 investigator not involved in the day to day administration of the trial will audit the trial  
36  
37 214 weekly.

38  
39 215 Ethics and dissemination

40  
41 216 We obtained ethical approval from our institutions Human Research Ethics Committee  
42  
43 217 (HREC), approval number HC210908. We will obtain informed consent from all participants  
44  
45 218 before participating in the trial. Protocol amendments will be numbered and uploaded to the  
46  
47 219 trial site on the Open Science Framework platform. Participants can remain anonymous. We  
48  
49 220 will collect general demographic data only. All authors will declare declarations of interest.  
50  
51 221 Data will be available on request from the corresponding author on completion of this trial.  
52  
53 222 We will store data securely for seven years as directed by our institutional HREC. We will  
54  
55 223 publish the results in a peer-reviewed medical journal. We will also publish the results on  
56  
57 224 institution websites.

1  
2  
3 225 Patient and public involvement  
4

5 226 Consumers with low back pain were consulted throughout the design of the intervention  
6  
7 227 process. Each major milestone of the intervention development was reviewed by members of  
8  
9 228 the Musculoskeletal Health Consumer Community Council for Maridulu Budyari Gumal  
10  
11 229 (SPHERE), before proceeding to the next stage. The consumer group provided suggestions  
12  
13 230 which were implemented in the revised versions including changes to language and written  
14  
15 231 text superimposed in both videos. We sought feedback from the consumer community  
16  
17 232 council on the design of the survey to understand and minimise the burden of the intervention  
18  
19 233 and the time required to participate. We will ask the consumer community council to assist  
20  
21 234 with recruitment by sharing a link to the survey platform in their networks. We will continue  
22  
23 235 to consult with the consumer community council when disseminating the study results to  
24  
25 236 assist with choosing what information and results to share and in what format. We  
26  
27 237 acknowledge that the impact of research can vary depending on where the research is  
28  
29 238 conducted, [39] and there is a risk that the results have less impact with international  
30  
31 239 audiences or minority groups. If successful we will seek guidance from international  
32  
33 240 consumer and minority groups to understand how to reflect the preferences and needs of  
34  
35 241 people from different communities in future iterations of this video.  
36  
37  
38  
39  
40  
41  
42  
43  
44  
45  
46  
47  
48  
49  
50  
51  
52  
53  
54  
55  
56  
57  
58  
59  
60

1  
2  
3 243 **Competing interests**  
4  
5

6 244 The authors have no known declarations.  
7  
8

9 245 **Funding**  
10  
11

12 246 We received funding from Maridulu Budyari Gumal (SPHERE) for this project.  
13  
14  
15

16 247 **Contributorship Statement**  
17  
18

19 248 EO conceived the RCT, provided methodological expertise and wrote the protocol  
20

21 249 ACT provided methodological expertise  
22

23 250 SMS provided methodological expertise  
24

25 251 SO provided methodological expertise  
26

27 252 BMW provided methodological expertise  
28

29 253 AGC provided methodological expertise  
30

31 254 CMW provided methodological expertise  
32

33 255 IAH provided methodological expertise  
34

35 256 JHM is the guarantor and conceived the RCT, provided methodological and clinical area  
36 expertise  
37

38 258 All authors read, contributed to and approved the final version of the manuscript  
39  
40

41 259  
42

43 260  
44

45 261  
46  
47  
48  
49  
50  
51  
52  
53  
54  
55  
56  
57  
58  
59  
60

262 **References**

- 263 1 Kyu H, Abate D, Abate K, *et al.* Global , regional , and national disability-adjusted  
264 life-years ( DALYs ) for 359 diseases and injuries and healthy life expectancy ( HALE  
265 ) for 195 countries and territories , 1990 – 2017 : a systematic analysis for the Global  
266 Burden of Disease Study 201. *Lancet* 2018;**392**:1859–922. doi:10.1016/S0140-  
267 6736(18)32335-3
- 268 2 Collaborators G 2019 D and I. Global burden of 369 diseases and injuries in 204  
269 countries and territories, 1990–2019: a systematic analysis for the Global Burden of  
270 Disease Study 2019. *Lancet* 2020;**396**:1204–22. doi:10.1016/S0140-6736(20)30925-9
- 271 3 Hartvigsen J, Hancock MJ, Kongsted A, *et al.* What low back pain is and why we need  
272 to pay attention. *Lancet* 2018;**391**:2356–67. doi:10.1016/S0140-6736(18)30480-X
- 273 4 Foster NE, Anema JR, Cherkin D, *et al.* Prevention and treatment of low back pain:  
274 evidence, challenges, and promising directions. *Lancet* Published Online First: 2018.  
275 doi:10.1016/S0140-6736(18)30489-6
- 276 5 Leake HB, Moseley GL, Stanton TR, *et al.* What do patients value learning about  
277 pain? A mixed methods survey on the relevance of target concepts following pain  
278 science education. *Pain* 2021;**162**:2558–68. doi:10.1097/j.pain.0000000000002244
- 279 6 O’Hagan ET, Di Pietro F, Traeger AC, *et al.* What messages predict intention to self-  
280 manage low back pain? A study of attitudes towards patient education. *Pain* Published  
281 Online First: 2022. doi:doi: 10.1097/j.pain.0000000000002530
- 282 7 Abenham L, Rossignol M, Gabeille D, *et al.* The prognostic consequences in the  
283 Making of the Initial Medical Diagnosis of Work-Related Back Injuries. *Spine (Phila*  
284 *Pa 1976)* 1995;**20**:791.
- 285 8 Black NM, Sullivan SJ, Mani R. A biopsychosocial understanding of lower back pain:  
286 Content analysis of online information. *Eur J Pain* 2017;:1–17. doi:10.1002/ejp.1158
- 287 9 Ferreira G, Traeger AC, Machado G, *et al.* Credibility, accuracy, and  
288 comprehensiveness of internet-based information about low back pain: A systematic  
289 review. *J Med Internet Res* 2019;**21**:1–10. doi:10.2196/13357
- 290 10 Munigangaiah S, Basavaraju N, Jadaan DY, *et al.* Do “Myths” of low back pain exist  
291 among Irish population? A cross-sectional study. *Eur J Orthop Surg Traumatol*  
292 2016;**26**:41–6. doi:10.1007/s00590-015-1698-y
- 293 11 Jenkins HJ, Hancock MJ, Maher CG, *et al.* Understanding patient beliefs regarding the



- 1  
2  
3 294 use of imaging in the management of low back pain. *Eur J Pain (United Kingdom)*  
4 295 2016;**20**:573–80. doi:10.1002/ejp.764
- 6 296 12 Werner EL, Ihlebaek C, Skouen JS, *et al.* Beliefs about low back pain in the  
8 297 Norwegian general population: are they related to pain experiences and health  
9 298 professionals? *Spine (Phila Pa 1976)* 2005;**30**:1770–6.  
11 299 doi:10.1097/01.brs.0000171909.81632.fe
- 13 300 13 Christe G, Pizzolato V, Meyer M, *et al.* Unhelpful beliefs and attitudes about low back  
14 301 pain in the general population: A cross-sectional survey. *Musculoskelet Sci Pract*  
16 302 2021;**52**:102342. doi:10.1016/j.msksp.2021.102342
- 18 303 14 Hall A, Coombs D, Richmond H, *et al.* What do the general public believe about the  
20 304 causes, prognosis and best management strategies for low back pain? A cross-sectional  
21 305 study. *BMC Public Health* 2021;**21**:682. doi:10.1186/s12889-021-10664-5
- 23 306 15 Buchbinder R, Underwood M, Hartvigsen J, *et al.* The Lancet Series call to action to  
25 307 reduce low value care for low back pain: an update. *Pain* 2020;**161**:S57–64.  
26 308 doi:10.1097/j.pain.0000000000001869
- 28 309 16 Buchbinder R, Jolley D, Wyatt M. 2001 Volvo Award Winner in Clinical Studies:  
30 310 Effects of a media campaign on back pain beliefs and its potential influence on  
31 311 management of low back pain in general practice. *Spine (Phila Pa 1976)*  
32 312 2001;**26**:2535–42. doi:10.1097/00007632-200112010-00005
- 34 313 17 Suman A, Armijo-olivo S, Deshpande S, *et al.* A systematic review of the  
36 314 effectiveness of mass media campaigns for the management of low back pain. *Disabil*  
37 315 *Rehabil* 2020;**1**–29. doi:10.1080/09638288.2020.1743777
- 39 316 18 Mm B, Strzeszynski L. Mass media interventions for smoking cessation in adults (   
41 317 Review ). Published Online First: 2017.  
42 318 doi:10.1002/14651858.CD004704.pub4.www.cochranelibrary.com
- 44 319 19 Grilli R, Ramsay C, Minozzi S. Mass media interventions: e ects on health services  
46 320 utilisation (Review). Published Online First: 2002.  
47 321 doi:10.1002/14651858.CD000389.www.cochranelibrary.com
- 49 322 20 Buchbinder R, Jolley D, Wyatt M. Population based intervention to change back pain  
51 323 beliefs and disability: three part evaluation. *BMJ Br Med J* 2001;**322**:1516–  
52 324 20.<http://www.bmj.com/content/bmj/322/7301/1516.full.pdf> (accessed 19 Mar 2018).
- 54 325 21 Werner EL, Ihlebæk C, Lærum E, *et al.* Low back pain media campaign: No effect on  
55 326 sickness behaviour. *Patient Educ Couns* 2008;**71**:198–203.

- 1  
2  
3 327 doi:10.1016/j.pec.2007.12.009  
4  
5 328 22 Werner EL, Gross DP. The effects of a media campaign on beliefs and utilization of  
6  
7 329 imaging examinations in Norwegian patients with low back pain. 2009.  
8  
9 330 23 Waddell G, O'Connor M, Boorman S, *et al*. Working Backs Scotland: A Public and  
10  
11 331 Professional Health Education Campaign for Back Pain. *Spine (Phila Pa 1976)*  
12 332 2007;**32**:2139.  
13  
14 333 24 Cunningham CG, Flynn TA, Toole CM, *et al*. Working Backs Project —  
15  
16 334 implementing low back pain guidelines. 2008;:580–3. doi:10.1093/occmed/kqn116  
17 335 25 Gross DP, Russell AS, Ferrari R, *et al*. Evaluation of a Canadian back pain mass media  
18  
19 336 campaign. *Spine (Phila Pa 1976)* 2010;**35**:906–13.  
20  
21 337 doi:10.1097/BRS.0b013e3181c91140  
22  
23 338 26 Capurro D, Cole K, Echavarría MI, *et al*. The Use of Social Networking Sites for  
24  
25 339 Public Health Practice and Research: A Systematic Review. *J Med Internet Res*  
26 340 2014;**16**. doi:10.2196/jmir.2679  
27  
28 341 27 Vivid Social. Social Media Statistics Australia – January 2021.  
29 342 <https://www.socialmedianews.com.au/social-media-statistics-australia-january-2021/>  
30 343 (accessed 7 Jul 2020).  
31  
32 344 28 Kim HS. Attracting Views and Going Viral: How Message Features and News-  
33 345 Sharing Channels Affect Health Diffusion. *J Commun* 2015;**65**:512–34.  
34 346 doi:10.1111/jcom.12160.Attracting  
35  
36 347 29 Yammine BS. Fight Coronavirus Misinformation. Using social media to spread good  
37 348 pandemic science. *Nature* 2020;**581**:345.  
38  
39 349 30 Moorhead SA, Hazlett DE, Harrison L, *et al*. A new dimension of health care:  
40  
41 350 Systematic review of the uses, benefits, and limitations of social media for health  
42  
43 351 communication. *J Med Internet Res* 2013;**15**:1–17. doi:10.2196/jmir.1933  
44  
45 352 31 Neiger BL, Thackeray R, Wagenen SA Van, *et al*. Use of Social Media in Health  
46 353 Promotion: Purposes, Key Performance Indicators, and Evaluation Metrics. *Health*  
47 354 *Promot Pract* 2012;**13**:159–64. doi:10.1177/1524839911433467  
48  
49 355 32 Chan A, Tetzlaff JM, Altman DG. SPIRIT 2013 Statement : Defining Standard  
50 356 Protocol Items for Clinical Trials. *Ann Intern Med* 2016;**158**:200–7. doi:10.7326/0003-  
51 357 4819-158-3-201302050-00583.Requests  
52  
53 358 33 O'Hagan ET, Traeger AC, Bunzli S, *et al*. What do people post on social media  
54 359 relative to low back pain? A content analysis of Australian data. *Musculoskelet Sci*  
55  
56  
57  
58  
59  
60

- 1  
2  
3 360 *Pract* 2021;**54**:102402. doi:10.1016/j.msksp.2021.102402  
4  
5 361 34 Nicholas M. Pain self efficacy questionnaire (PSEQ). ... *Univ Sydney Pain Manag*  
6  
7 362 *Res* ... 1994;**5**–6.[http://www.tac.vic.gov.au/files-to-](http://www.tac.vic.gov.au/files-to-move/media/upload/pain_self_efficacy_questionnaire.pdf)  
8  
9 363 [move/media/upload/pain\\_self\\_efficacy\\_questionnaire.pdf](http://www.tac.vic.gov.au/files-to-move/media/upload/pain_self_efficacy_questionnaire.pdf)  
10  
11 364 35 Di Pietro F, Catley MJ, McAuley JH, *et al.* Rasch analysis supports the use of the pain  
12  
13 365 self-efficacy questionnaire. *Phys Ther* 2014;**94**:91–100. doi:10.2522/ptj.20130217  
14  
15 366 36 O’Hagan ET, Skinner IW, Jones MD, *et al.* Development and Measurement Properties  
16  
17 367 of the AxEL (Attitude toward Education and advice for Low back pain) Questionnaire.  
18  
19 368 *BMC Heal Qual Life Outcomes* 2022;**20**. doi:[https://doi.org/10.1186/s12955-021-](https://doi.org/10.1186/s12955-021-01908-4)  
20  
21 369 [01908-4](https://doi.org/10.1186/s12955-021-01908-4)  
22  
23 370 37 Smith R, Orgill S, Smith SM, *et al.* Qualtrics XM// The Leading Experience  
24  
25 371 Management Software. 2002.<https://www.qualtrics.com>  
26  
27 372 38 Team RC. R: A language and environment for statistical computing (Version 3.4.  
28  
29 373 2)[Computer software]. In: *R: A language and environment for statistical computing*.  
30  
31 374 *R Foundation for Statistical Computing*. Vienna, Austria: 2012. [http://www.r-](http://www.r-project.org/)  
32  
33 375 [project.org/](http://www.r-project.org/)  
34  
35 376 39 O’Hagan ET, Rizzo RRN, O’Keeffe M. Impact of being first : comparing media  
36  
37 377 coverage for two studies investigating the relationship between exercise. *Br J Sports*  
38  
39 378 *Med* 2021;**0**:1–2. doi:10.1136/bjsports-2021-105012  
40  
41  
42  
43  
44  
45  
46  
47  
48  
49  
50  
51  
52  
53  
54  
55  
56  
57  
58  
59  
60

1  
2  
3  
4  
5  
6  
7  
8  
9  
10  
11  
12  
13  
14  
15  
16  
17  
18  
19  
20  
21  
22  
23  
24  
25  
26  
27  
28  
29  
30  
31  
32  
33  
34  
35  
36  
37  
38  
39  
40  
41  
42  
43  
44  
45  
46  
47  
48  
49  
50  
51  
52  
53  
54  
55  
56  
57  
58  
59  
60

381 **Figure 1- Participant progress through the study**

382

For peer review only

Figure 1- Participant progress through the study

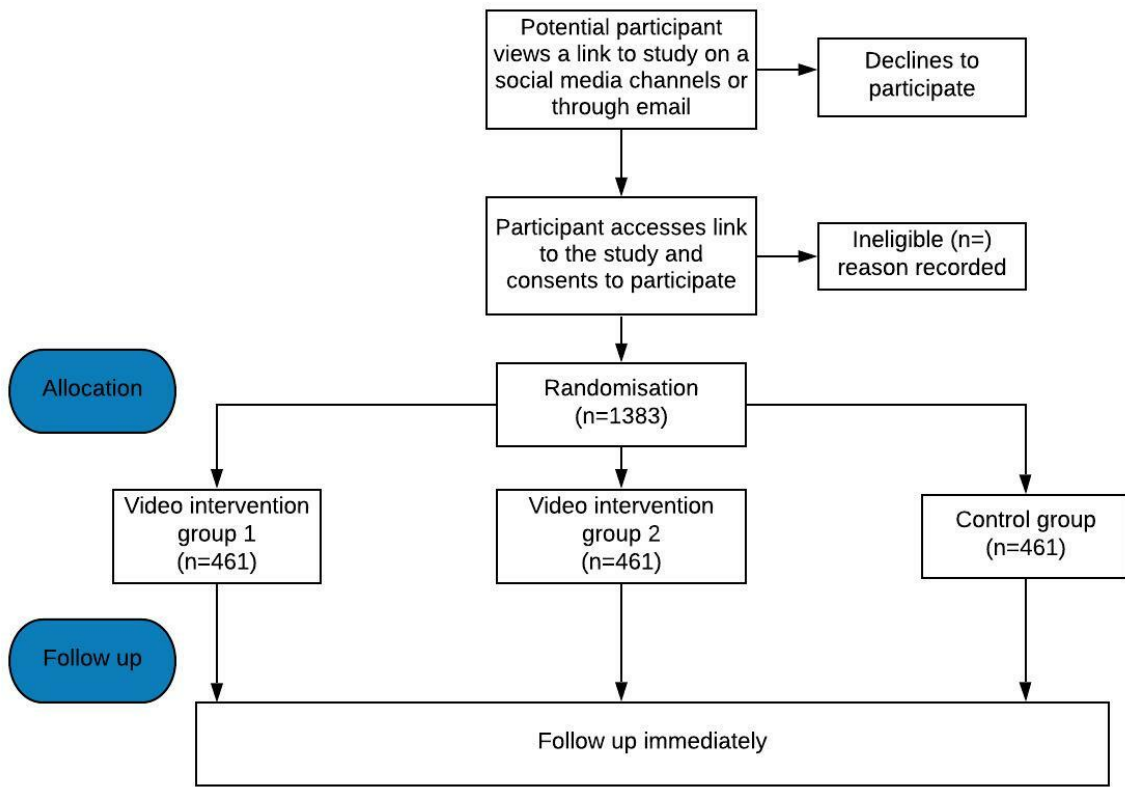

view only

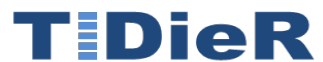

Template for Intervention  
Description and Replication

## The TIDieR (Template for Intervention Description and Replication) Checklist\*:

Information to include when describing an intervention and the location of the information

| Item number | Item                                                                                                                                                                                                                                                                                                                                                                                                                                                                                                                                                                                                          | Where located **                              |                   |
|-------------|---------------------------------------------------------------------------------------------------------------------------------------------------------------------------------------------------------------------------------------------------------------------------------------------------------------------------------------------------------------------------------------------------------------------------------------------------------------------------------------------------------------------------------------------------------------------------------------------------------------|-----------------------------------------------|-------------------|
|             |                                                                                                                                                                                                                                                                                                                                                                                                                                                                                                                                                                                                               | Primary paper<br>(page or appendix<br>number) | Other † (details) |
|             | <b>BRIEF NAME</b>                                                                                                                                                                                                                                                                                                                                                                                                                                                                                                                                                                                             |                                               |                   |
| 1.          | A video designed for dissemination on social media to increase people's confidence becoming more active despite back pain.                                                                                                                                                                                                                                                                                                                                                                                                                                                                                    | 1                                             | _____             |
|             | <b>WHY</b>                                                                                                                                                                                                                                                                                                                                                                                                                                                                                                                                                                                                    |                                               |                   |
| 2.          | A carefully considered, engaging social media message could provide a low-cost alternative to deliver a media campaign about low back pain.                                                                                                                                                                                                                                                                                                                                                                                                                                                                   | 3, 4                                          | _____             |
|             | <b>WHAT</b>                                                                                                                                                                                                                                                                                                                                                                                                                                                                                                                                                                                                   |                                               |                   |
| 3.          | Materials: The scientists involved in this study met to identify the most important message to be communicated to the general public about low back pain. Next, the scientists met with designers at an advertising agency to discuss and formalise a brief for the intervention. The advertising agency produced three initial storyboards to satisfy the brief for the video intervention, of which, one idea was refined over a series of meetings between the scientists and designers to form two video interventions used in this study.                                                                | 4, 5                                          | _____             |
|             | Before deciding on the final content and format the researchers presented the proposed video interventions to a consumer group for review. The consumer group recommend some changes to the language used in the superimposed text in both videos.                                                                                                                                                                                                                                                                                                                                                            |                                               |                   |
| 4.          | Procedures:                                                                                                                                                                                                                                                                                                                                                                                                                                                                                                                                                                                                   | 5                                             | _____             |
|             | The final version of each video intervention is between 2 and 3 minutes long. Both follow the same narrative, that scientists would like to reassure the public that low back pain is common, but evidence suggests that it is safe to move despite back pain. The featured scientists report that they are unsure of how to convey this message to the public, which leads to the introduction of designers at the advertising agency brainstorming how to help deliver the message that it is safe to move. The advertising agency personnel suggest a dance. The video cuts back to the scientists who are |                                               |                   |

|    |                                                                                                             |    |       |
|----|-------------------------------------------------------------------------------------------------------------|----|-------|
| 1  | reluctant to endorse one specific movement, such as dance and conclude that it does not matter              |    |       |
| 2  | what you do as long as you move. The video concludes with the text, "It's safe to move", "Your              |    |       |
| 3  | backbone has backbone". The second video is exactly the same as the first, except when the                  |    |       |
| 4  | advertising agency recommends the dance, the scientists try it out and to add humour, there are             |    |       |
| 5  | some video clips of the scientists dancing.                                                                 |    |       |
| 6  |                                                                                                             |    |       |
| 7  |                                                                                                             |    |       |
| 8  | <b>WHO PROVIDED</b>                                                                                         |    |       |
| 9  | 5. Participants will access the survey via an email or an anonymous link on social media.                   | 7  | _____ |
| 10 |                                                                                                             |    |       |
| 11 | <b>HOW</b>                                                                                                  |    |       |
| 12 | 6. The video will run as an item in the survey, that the participant will click to access as part of survey | 7  | _____ |
| 13 | process.                                                                                                    |    |       |
| 14 | <b>WHERE</b>                                                                                                |    |       |
| 15 |                                                                                                             |    |       |
| 16 | 7. Each intervention will be delivered online.                                                              | 7  | _____ |
| 17 |                                                                                                             |    |       |
| 18 |                                                                                                             |    |       |
| 19 |                                                                                                             |    |       |
| 20 | <b>WHEN and HOW MUCH</b>                                                                                    |    |       |
| 21 | 8. Each intervention will be delivered, immediately after obtaining consent. Participants will have access  | 8  | _____ |
| 22 | to the allocated video intervention once.                                                                   |    |       |
| 23 | <b>TAILORING</b>                                                                                            |    |       |
| 24 |                                                                                                             |    |       |
| 25 | 9. The researcher team will conduct a qualitative evaluation to enable tailoring of the intervention in     | 9  | _____ |
| 26 | future.                                                                                                     |    |       |
| 27 | <b>MODIFICATIONS</b>                                                                                        |    |       |
| 28 |                                                                                                             |    |       |
| 29 | 10.* If the intervention was modified during the course of the study, describe the changes (what, why,      | NA | _____ |
| 30 | when, and how).                                                                                             |    |       |
| 31 |                                                                                                             |    |       |
| 32 | <b>HOW WELL</b>                                                                                             |    |       |
| 33 |                                                                                                             |    |       |
| 34 | 11. Planned: If intervention adherence or fidelity was assessed, describe how and by whom, and if any       | NA | _____ |
| 35 | strategies were used to maintain or improve fidelity, describe them.                                        |    |       |
| 36 |                                                                                                             |    |       |
| 37 | 12.* Actual: If intervention adherence or fidelity was assessed, describe the extent to which the           | NA | _____ |
| 38 | intervention was delivered as planned.                                                                      |    |       |
| 39 |                                                                                                             |    |       |
| 40 |                                                                                                             |    |       |
| 41 |                                                                                                             |    |       |
| 42 |                                                                                                             |    |       |
| 43 |                                                                                                             |    |       |
| 44 |                                                                                                             |    |       |
| 45 |                                                                                                             |    |       |
| 46 |                                                                                                             |    |       |

1 **\*\* Authors** - use N/A if an item is not applicable for the intervention being described. **Reviewers** – use ‘?’ if information about the element is not reported/not  
2 sufficiently reported.  
3

4 † If the information is not provided in the primary paper, give details of where this information is available. This may include locations such as a published protocol  
5 or other published papers (provide citation details) or a website (provide the URL).  
6

7 ‡ If completing the TIDieR checklist for a protocol, these items are not relevant to the protocol and cannot be described until the study is complete.

8 \* We strongly recommend using this checklist in conjunction with the TIDieR guide (see *BMJ* 2014;348:g1687) which contains an explanation and elaboration for  
9 each item.  
10

11 \* The focus of TIDieR is on reporting details of the intervention elements (and where relevant, comparison elements) of a study. Other elements and methodological  
12 features of studies are covered by other reporting statements and checklists and have not been duplicated as part of the TIDieR checklist. When a **randomised**  
13 **trial** is being reported, the TIDieR checklist should be used in conjunction with the CONSORT statement (see [www.consort-statement.org](http://www.consort-statement.org)) as an extension of **Item**  
14 **5 of the CONSORT 2010 Statement**. When a **clinical trial protocol** is being reported, the TIDieR checklist should be used in conjunction with the SPIRIT  
15 statement as an extension of **Item 11 of the SPIRIT 2013 Statement** (see [www.spirit-statement.org](http://www.spirit-statement.org)). For alternate study designs, TIDieR can be used in  
16 conjunction with the appropriate checklist for that study design (see [www.equator-network.org](http://www.equator-network.org)).  
17  
18  
19  
20  
21  
22  
23  
24  
25  
26  
27  
28  
29  
30  
31  
32  
33  
34  
35  
36  
37  
38  
39  
40  
41  
42
